# Supplementary material for: Wissen und Fortbildungsbereitschaft bezüglich Reanimation
Source: Springer Nature journal article supplement (doi:10.1007/s10049-022-01101-0), 2022-11-25
Supplement: MOESM1 [file 23758730]

## Zusatzmaterial zum Beitrag „Wissen und Fortbildungsbereitschaft bezüglich Reanimation. Eine prospektive Querschnittsstudie bei Laien in Berlin

Friedrichshain. Nieth D; Henry ACJ; Wunderlich R et al. (2022) in *Notfall+Rettungsmedizin*.

Beitrag und Zusatzmaterial stehen Ihnen auf [www.springermedizin.de](http://www.springermedizin.de) zur Verfügung. Bitte geben Sie dort den Beitragstitel in die Suche ein.

---

# Fragebogen

## Vorabinformationen

### Q1

Laienreanimation beschreibt das Einleiten und Weiterführen von Basismaßnahmen zur Wiederbelebung von Menschen mit einem Herzkreislaufstillstand durch einen medizinischen Laien.

Ziel dieser Befragung ist die Identifikation von Wissenslücken der 40 bis 70-jährigen Bevölkerung in Berlin Friedrichshain in Erste-Hilfe-Maßnahmen, spezieller der Basisreanimation. Zeitgleich soll die Bereitschaft zu einer regelmäßigen (z. B. jährlichen) Fortbildung in Basisreanimation und Erste Hilfe erfragt werden.

Die Studie soll durch Aufmerksamkeitsförderung dazu beitragen das Überleben nach einem Herzkreislaufstillstand in Deutschland zu verbessern.

- Der „Plötzliche[...] Herztod ist ein unerwarteter Tod, der bei einer scheinbar gesunden Person innerhalb einer Stunde nach Beginn der Symptome, wenn beobachtet, eintritt.“
- Jedes Jahr sterben in Deutschland zwischen 50.000 und 75.000 Menschen am plötzlichen Herztod und seinen Folgen.
- Die Quote für Laienreanimation (Reanimation durch Passanten/Arbeitskollegen/Angehörigen) liegt in Deutschland bei aktuell ca. 40 %, also werden von 100 beobachteten Fällen nur 39 reanimiert.
- ~ 1/3 aller Betroffenen eines plötzlichen Herztodes sind zwischen 40 und 70 Jahren alt.
- Der wirtschaftliche Schaden durch den Verlust von Arbeitskräften durch den plötzlichen Herztod liegt aktuell bei ca. 14 Milliarden Euro pro Jahr, der Schaden für Betroffene ist unermesslich.
- Nach Schätzungen des „German Resuscitation Council“ (Deutscher Rat für Wiederbelebung) könnten in Deutschland durch sofortigen Beginn der Wiederbelebungsmaßnahmen jährlich bis zu 10.000 Menschenleben gerettet werden.

**Die Bearbeitung dauert ca. 6-10 Minuten. Die Befragung ist anonym. Mit der Teilnahme an diesem Fragebogen stimmen Sie einer Veröffentlichung der anonymisierten Ergebnisse uneingeschränkt zu.**

**Für ein möglichst aussagekräftiges Ergebnis ist es essenziell, dass Sie jede Frage nach bestem Wissen und Gewissen und ohne Hilfsmittel oder Dritte beantworten.**

## Demographie

### Q2

Haben Sie eine medizinische Vorbildung? (z. B. Betriebsanitäter, Pflegekraft, Rettungsfachpersonal, Arzt, ...)

- Ja
- Nein

### Q3

Alter:

- 40-50 Jahre
- 50-60 Jahre
- 60-70 Jahre
- Andere

### Q4

Geschlecht:

- Divers
- Weiblich
- Männlich

## Q5

Postleitzahl:

- 10243
- 10245
- 10247
- 10249
- Andere

## Vorwissen

### Q6

Haben Sie in der Vergangenheit an einem Erste-Hilfe-Kurs/ Reanimationstraining irgendeiner Art teilgenommen?

- Nein, noch nie
- Ja, innerhalb des letzten Jahres
- Ja, innerhalb der letzten 1-3 Jahre
- Ja, länger als 3 Jahre her
- Weiß ich nicht

### Q7

Fühlen Sie sich in der Lage einen Herzkreislaufstillstand zu erkennen und als Ersthelfer in Form einer Basisreanimation zu versorgen?

- Ja
- Nein
- Weiß ich nicht

➔ Wenn „nein“ oder „weiß ich nicht“, dann zu Zusatzfrage „Q8“

➔ Wenn „ja“ dann zu „Q9“

## Q8

Zusatzfrage HKS erkennen/ Durchführung Basisreanimation: Wieso nicht?  
(Mehrfachnennung möglich)

- Angst etwas falsch zu machen/ Schaden zuzufügen
- Angst vor zivil-strafrechtlichen Folgen (bei fehlerhafter Hilfeleistung)
- Ekel
- Fehlendes Wissen
- Aufgabe des Rettungsdienstes/ Feuerwehr
- Sonstiges (freie Eingabe)

## Q9

Wissen Sie was ein sog. AED oder „Automatisierter Externer Defibrillator“ ist?

- Ja
- Nein

➔ Wenn „ja“, dann zu Zusatzfrage „Q10“

➔ Wenn „nein“, dann weiter zu „Q11“

## Q10

Können Sie einen AED verwenden/anwenden?

- Nur in der Theorie
- Theorie und Praxis
- Nein

## Notfallsituationen #1-3

Sie sehen im Folgenden drei kurze Videos zum Thema Laienreanimation und Erste Hilfe.

### Q11

Notfallsituation #1:

Sie finden eine hilflose Person vor, die Situation ist für Sie sicher. Welche Maßnahmen ergreifen Sie?

➔ Siehe Video #1 (bewusstlos, offensichtlich atmend)

### Q12

Notfallsituation #1: Welche Maßnahmen ergreifen Sie? (Mehrfachnennung möglich)

- Herzdruckmassage (+Beatmung)
- Atemwege/Atmung überprüfen
- Stabile Seitenlage
- 112 anrufen
- AED herbeiholen lassen, anlegen und anwenden
- Weiß ich nicht

### Q13

Notfallsituation #2:

Sie finden eine hilflose Person vor, die Situation ist für Sie sicher. Welche Maßnahmen ergreifen Sie?

➔ Siehe Video #2 (Schnappatmung)

### Q14

Notfallsituation #2: Welche Maßnahmen ergreifen Sie? (Mehrfachnennung möglich)

- 112 anrufen
- Herzdruckmassage (+Beatmung)
- Stabile Seitenlage
- Atemwege/Atmung überprüfen
- AED herbeiholen lassen, anlegen und anwenden
- Weiß ich nicht

### Q15

Notfallsituation #3:

Sie finden eine hilflose Person vor, die Situation ist für Sie sicher. Welche Maßnahmen ergreifen Sie?

➔ Siehe Video #3 (bewusstlos, offensichtlich nicht atmend)

## Q16

Notfallsituation #3: Welche Maßnahmen ergreifen Sie? (Mehrfachnennung möglich)

- Stabile Seitenlage
- Herzdruckmassage (+Beatmung)
- 112 anrufen
- Atemwege/Atmung überprüfen
- AED herbeiholen lassen, anlegen und anwenden
- Weiß ich nicht



## Kennntnisstand, Teil 2

### Q17

Mit welchem Verhältnis von Brustkompressionen zu Beatmungen würden Sie idealerweise und nach geltenden internationalen Standards reanimieren?

- 15/2
- 30/2
- 1/1
- 5/5
- 2/5
- Weiß ich nicht

### Q18

Mit welcher Frequenz würden Sie drücken? (Kompressionen pro Minute)

- 40-60
- 60-80
- 100-120
- 140-160
- 160-180
- Weiß ich nicht

## Q19

Wie tief muss der Brustkorb für eine effektive Reanimation beim Erwachsenen eingedrückt werden?

- 2-3 cm
- 3-4 cm
- 4-5 cm
- 5-6 cm
- 6-7 cm
- Weiß ich nicht

## Q20

Ist es hilfreich im Zweifel nur zu drücken und nicht zu Beatmen? (Änderung bezüglich SARS-CoV-2, siehe Zusatzinformationen)

- Ja
- Nein
- Weiß ich nicht

## Q21

Die richtige Reihenfolge bei der Durchführung einer Laienreanimation ist:

- 1. Atmung Prüfen, 2. Drücken, 3. 112 Rufen
- 1. 112 Rufen, 2. Atmung Prüfen, 3. Drücken
- 1. Atmung Prüfen, 2. 112 Rufen, 3. Drücken
- 1. Drücken, 2. 112 Rufen, 3. Atmung Prüfen
- 1. Drücken, 2. Atmung Prüfen, 3. 112 Rufen
- Weiß ich nicht

## Q22

Nach welcher Zeit fangen Gehirnzellen bei einem Herzkreislaufstillstand an abzusterben?

- Sofort
- 3-5 Minuten
- 7-9 Minuten
- 11-13 Minuten
- 15-17 Minuten
- Weiß ich nicht

### Q23

Wie lange braucht die Berliner Feuerwehr im Durchschnitt zu einem Notfalleinsatzort?

- 3-4 Minuten
- 6-7 Minuten
- 10-11 Minuten
- 12-13 Minuten
- 15-16 Minuten
- Weiß ich nicht

### Q24

Erfüllt ein „Nicht-Helfen“ im Notfall den Straftatbestand „unterlassene Hilfeleistung“ nach § 323 c StGB?

- Ja, immer
- Ja, in manchen Fällen
- Nein, niemals
- Weiß ich nicht

## **Bereitschaft zu einer regelmäßigen Erste-Hilfe-Fortbildung**

### **Q25**

Wären Sie zu einer regelmäßigen Fortbildung für Basisreanimation und Erste Hilfe bereit? (z. B. online, jährlich, 30 Minuten)

- Ja
- Nein
- Weiß ich nicht

### **Abschlussvideo „Ein Leben Retten“**

### **Q26**

<https://www.youtube.com/watch?v=n9hk8N6n1G4>

**Vielen Dank für Ihre Teilnahme. Bleiben Sie gesund.**
